# Supplementary material for: A Homogeneous Polysaccharide from Fructus Schisandra chinensis (Turz.) Baill Induces Mitochondrial Apoptosis through the Hsp90/AKT Signalling Pathway in HepG2 Cells
Source: Int J Mol Sci. 2016 Jun 28;17(7):1015. doi: 10.3390/ijms17071015 (PMC4964391; doi:10.3390/ijms17071015)
Supplement: Supplementary file 1 [file ijms-17-01015-s001.pdf]

# Supplementary Materials: A Homogeneous Polysaccharide from Fructus *Schisandra chinensis* (Turz.) Baill Induces Mitochondrial Apoptosis through the Hsp90/AKT Signalling Pathway in HepG2 Cells

Yonglin Chen, Songshan Shi, Huijun Wang, Ning Li, Juan Su, Guixin Chou and Shunchun Wang

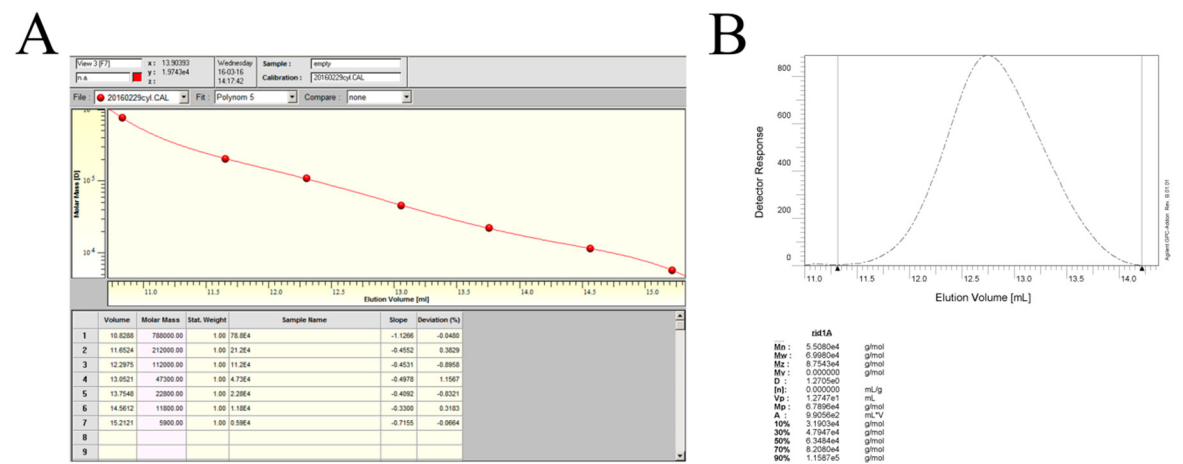

**Figure S1.** The molecular weight of *S. chinensis* polysaccharide-0-1. (A) Standard molecular markers in reference to P-series Dextran (i.e., Pullulan P-5, P-10, P-20, P-50, P-100, P-200, and P-800, Shodex); (B) The molecular weight of *S. chinensis* polysaccharide-0-1 (SCP-0-1) was estimated to be 69.980 kDa.

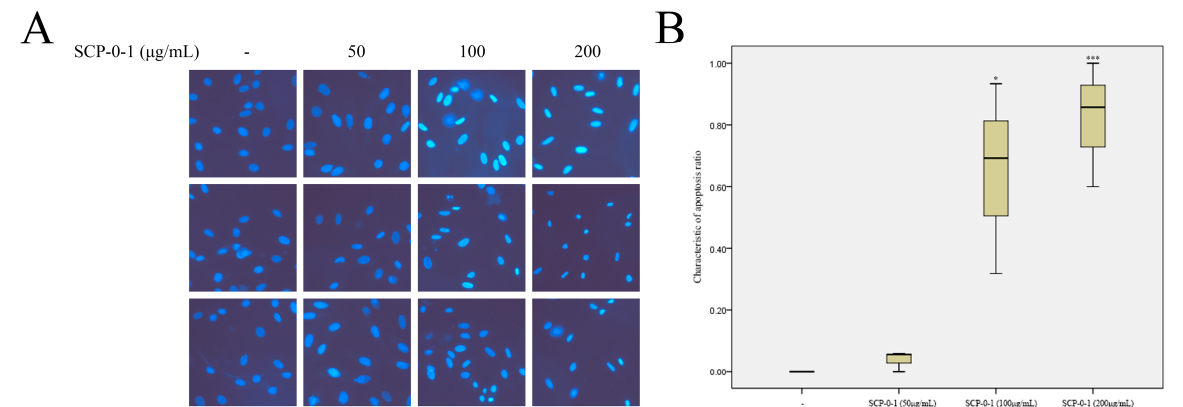

**Figure S2.** Nuclear morphology staining using Hoechst 33258. (A) The morphological characterisation of cell nuclei was analysed under a fluorescence microscope (magnification: 400×). Condensed chromatin are shown to contain compacted chromatin, which is characteristic of apoptosis; (B) Its related data (characteristic of apoptosis ratio) were presented as the mean values  $\pm$  SD of three independent experiments. \*  $p < 0.05$  and \*\*\*  $p < 0.001$  versus control group.

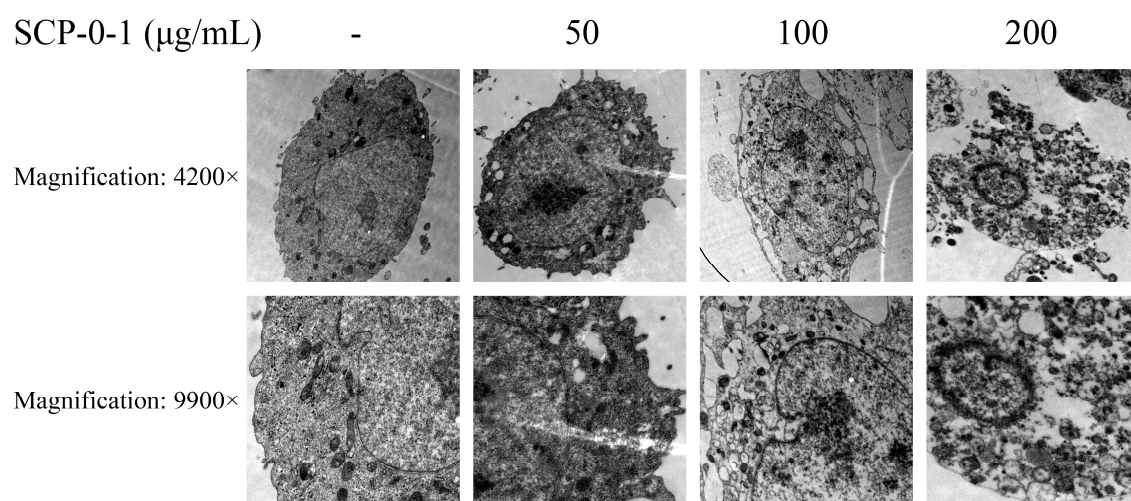

**Figure S3.** Morphological changes induced by *S. chinensis* polysaccharide-0-1. After treatment with 100–200  $\mu\text{g/mL}$  SCP-0-1 for 24 h, cellular morphology was observed under a transmission electron microscope (magnification: 4200 $\times$  and 9900 $\times$ ). An inhibitory effect of SCP-0-1 on cell growth is observed as being accompanied by membrane blebbing and condensed chromatin, which are characteristic of apoptosis.
